# Supplementary material for: Hydroxytyrosol Promotes the Mitochondrial Function through Activating Mitophagy
Source: MDPI journal article supplement (doi:10.3390/antiox11050893), 2022-04-30
Supplement: s1 [file s1]

**Table S1.** Formulation and proximate composition of experimental diets.

| Ingredients (g/kg)                  | NFD   | HFD   | NFD+HT | HFD+HT |
|-------------------------------------|-------|-------|--------|--------|
| Fish meal                           | 268.5 | 268.5 | 268.5  | 268.5  |
| Poultry meal                        | 84.7  | 84.7  | 84.7   | 84.7   |
| Gluten flour                        | 73    | 87.5  | 73     | 87.5   |
| Soybean meal                        | 250   | 250   | 250    | 250    |
| $\alpha$ -starch                    | 30    | 30    | 30     | 30     |
| Wheat Flour                         | 201.1 | 125.1 | 200.9  | 124.9  |
| Fish oil                            | 19.3  | 50    | 19.3   | 50     |
| Soybean oil                         | 19.3  | 50    | 19.3   | 50     |
| Soybean lecithin                    | 20    | 20    | 20     | 20     |
| Premix <sup>1</sup>                 | 13.5  | 13.5  | 13.5   | 13.5   |
| Calcium biphosphate                 | 20.8  | 20.8  | 20.8   | 20.8   |
| Hydroxytyrosol                      | -     | -     | 0.2    | 0.2    |
| <b>Proximate composition (g/kg)</b> |       |       |        |        |
| Protein                             | 440   | 440   | 440    | 440    |
| Lipid                               | 100   | 160   | 100    | 160    |

<sup>1</sup>Premix supplied the following minerals (g/kg) and vitamins (IU or mg/kg): CuSO<sub>4</sub>·5H<sub>2</sub>O, 2.0 g; FeSO<sub>4</sub>·7H<sub>2</sub>O, 25 g; ZnSO<sub>4</sub>·7H<sub>2</sub>O, 22 g; MnSO<sub>4</sub>·4H<sub>2</sub>O, 7 g; Na<sub>2</sub>SeO<sub>3</sub>, 0.04 g; KI, 0.026 g; CoCl<sub>2</sub>·6H<sub>2</sub>O, 0.1 g; Vitamin A, 900000 IU; Vitamin D, 200000 IU; Vitamin E, 4500 mg; Vitamin K3, 220 mg; Vitamin B1, 320 mg; Vitamin B2, 1090 mg; Niacin, 2800 mg; Vitamin B5, 2000 mg; Vitamin B6, 500 mg; Vitamin B12, 1.6 mg; Vitamin C, 5000 mg; Pantothenate, 1000 mg; Folic acid, 165 mg; Choline, 60000 mg.

**Table S2.** Sequences of primers used for RT-qPCR.

| Target gene                   | Forward (5'-3')      | Reverse (5'-3')       |
|-------------------------------|----------------------|-----------------------|
| PINK1 <sup>1</sup>            | CTGTGAAAGCCCGGTACACT | TGATGTGGAACCTTTGGGGCA |
| Mu1l1 <sup>1</sup>            | GCTGCCGTGATACGAGTCAT | ACGTTGGACAAGGACTGGAC  |
| Atg5 <sup>1</sup>             | TCAGTCGCTGCCATTAGAGC | TCTCGTCACCTGCGAAAAC   |
| $\beta$ -actin <sup>1,a</sup> | TCGAGCACGGTATTGTGACC | TCAGGTGCAACTCTCAGCTC  |
| PINK1 <sup>2</sup>            | TCGGGAAAGGTTGTAACGCA | TTCGGGTTCAAGTCCACCAA  |
| Parkin <sup>2</sup>           | GGCTGTCCTGATTCGCTCAT | TGAAGAACACACTCCTCCGC  |
| $\beta$ -actin <sup>2,a</sup> | GCCATGGATGAGGAAATCGC | TCTGGGTCGTCCAACAATGG  |

<sup>1</sup>Primers for spotted seabass<sup>2</sup>Primers for zebrafish<sup>a</sup>Reference gene

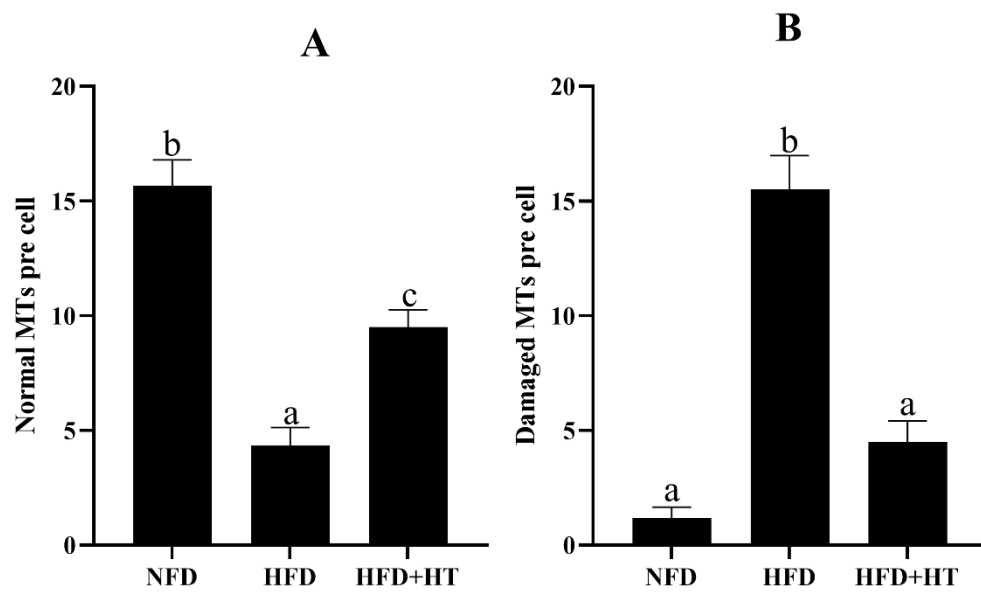

**Figure S1.** The number of normal mitochondria (A) and damaged mitochondria (B) in the liver TEM images of spotted seabass (*L. maculatus*) fed the test diets for 8 weeks. Values are shown as mean  $\pm$  SE (n=6). Different letters indicate significant difference differences among groups ( $P < 0.05$ ). NFD: normal fat diet (10% fat), HFD: high fat diet (16% fat), NFD+HT: NFD supplemented with 200 mg/kg of hydroxytyrosol (HT), HFD+HT: HFD supplemented with 200 mg/kg of HT.

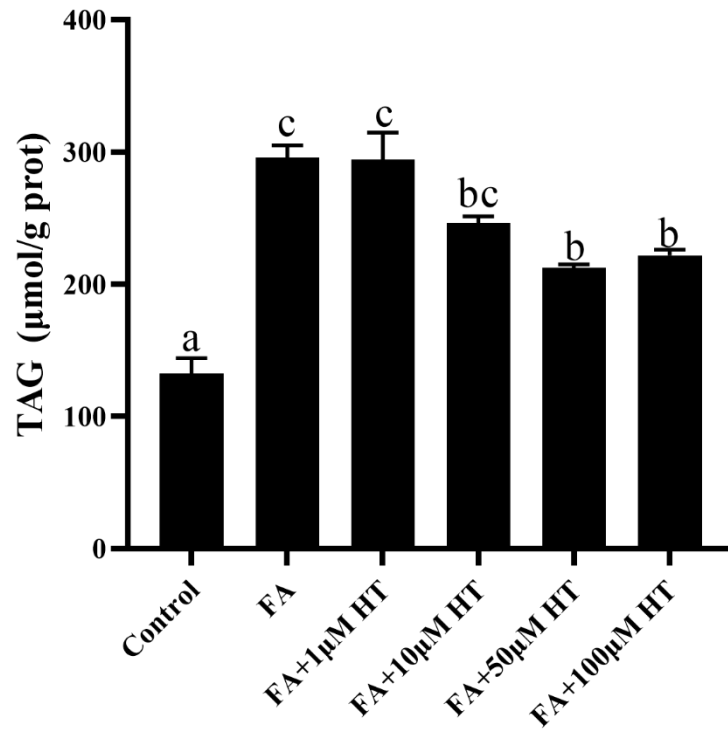

**Figure S2.** TAG content in ZFL cells (mean  $\pm$  SE, n=3). Control group: LDF medium, FA group: FA medium (LDF medium with 0.25 mM oleic acid and 0.25 mM palmitic acid), FA+HT group: FA medium adding different HT concentration. All values are exhibited as mean  $\pm$  SE. Different letters show significant differences ( $P < 0.05$ ).

Mtphagy Dye/Hoechst 33342

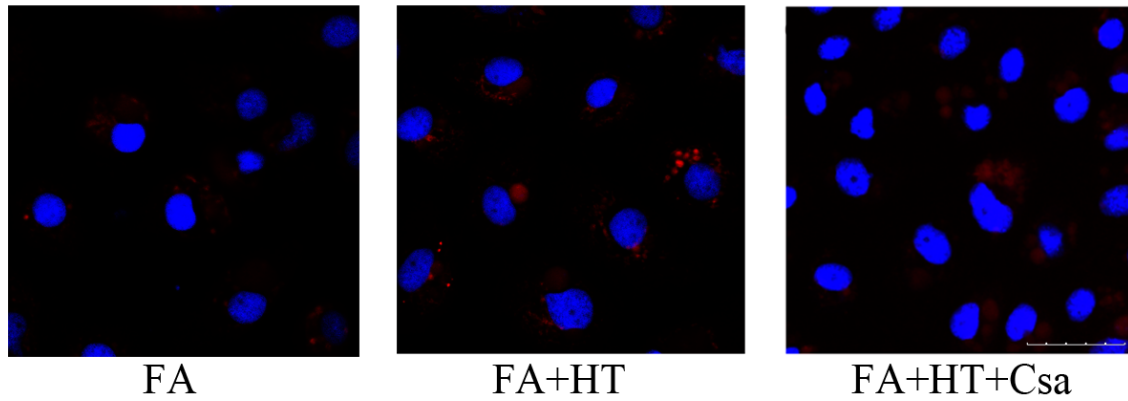

**Figure S3.** Staining of the mitochondrial autophagosome by Mtphagy Dye (red) in ZFL cell line.

Nuclei are highlighted with Hoechst 33342. Scale bar = 25  $\mu$ m

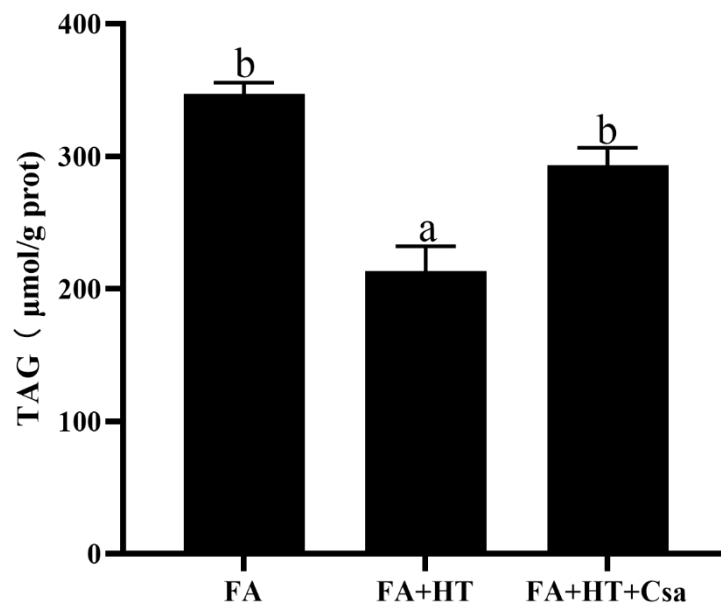

**Figure S4.** TAG content in ZFL cell line. All values are exhibited as mean  $\pm$  SE. Different letters show significant differences ( $P < 0.05$ ).
